# Supplementary material for: Integrative genomics identifies a convergent molecular subtype that links epigenomic with transcriptomic differences in autism
Source: PubMed Central journal article supplement (PMC7519165; doi:10.1038/s41467-020-18526-1), 2020-09-25
Supplement: 41467_2020_18526_MOESM3_ESM.pdf [file 41467_2020_18526_MOESM3_ESM.pdf]

## **Description of Additional Supplementary Files**

File Name: Supplementary Data 1

Description: ASD and Control sample metadata.

File Name: Supplementary Data 2

Description: Differential mRNA expression.

File Name: Supplementary Data 3

Description: Differential miRNA expression and target prediction.

File Name: Supplementary Data 4

Description: Differential DNA methylation and comethylation networks.

File Name: Supplementary Data 5

Description: Differential H3K27ac and gene links.
